# Supplementary material for: Representation of the QM Subsystem for Long-Range Electrostatic Interaction in Non-Periodic Ab Initio QM/MM Calculations
Source: PubMed Central journal article supplement (PMC6222767; doi:10.3390/molecules23102500), 2018-09-29
Supplement: molecules-23-02500-s001.pdf [file molecules-23-02500-s001.pdf]

# Supplementary Information for “Representation of the QM Subsystem for Long-Range Electrostatic Interaction in Non-Periodic Ab Initio QM/MM Calculations”

## Section S1. ANIONIC QM SUBSYSTEM: OLU<sup>-</sup>

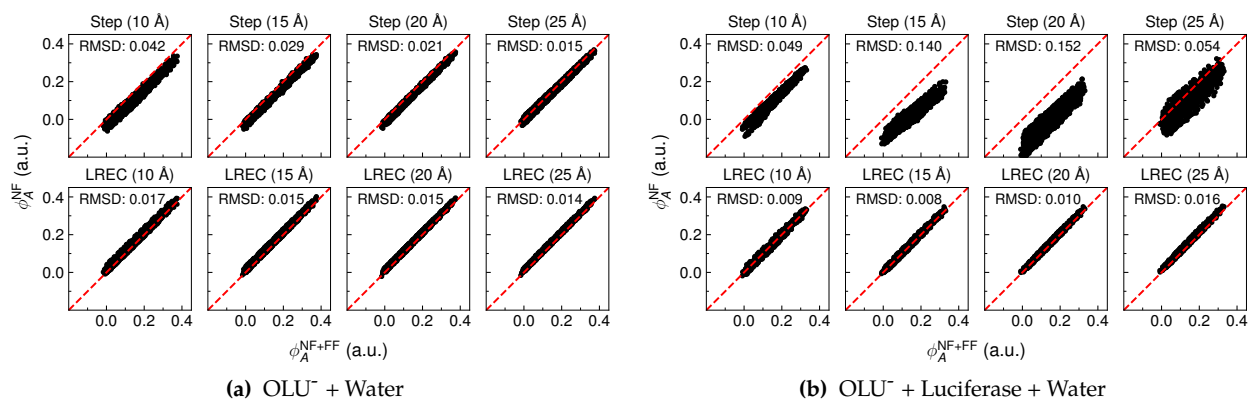

Figure S1. Atom-site potential from near-field MM charges *versus* atom-site potential from all MM charges. Each panel correspond to a different cutoff distance and either Step (near-field MM charges are not scaled) or LREC (near-field MM charges are scaled) scheme.

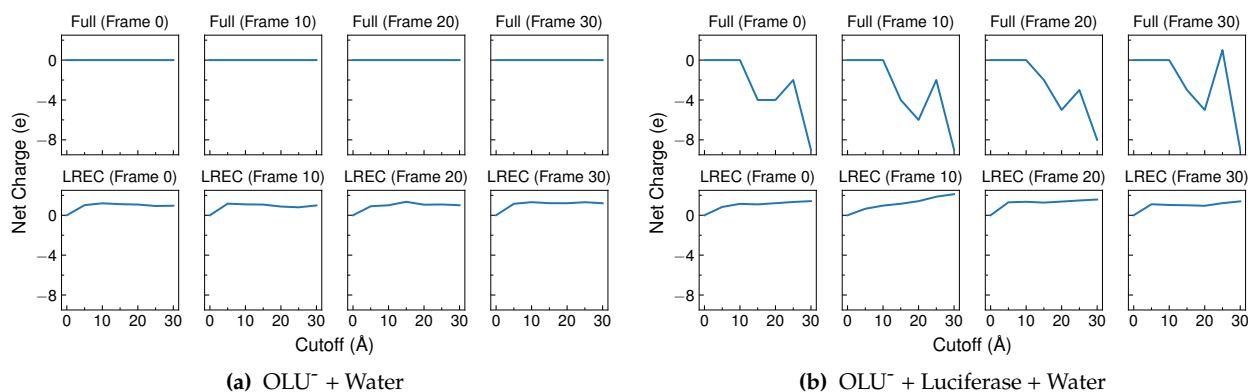

Figure S2. Sum of near-field MM charges at different cutoff distances. Each panel refers to either Step (near-field MM charges are not scaled) or LREC (near-field MM charges are scaled) scheme.
